# Supplementary material for: CsrA maximizes expression of the AcrAB multidrug resistance transporter
Source: PubMed Central journal article supplement — Nucleic Acids Res. 2017 Oct 13;45(22):12798–807. doi: 10.1093/nar/gkx929 (PMC5727465; doi:10.1093/nar/gkx929), 2017-10-13
Supplement: gkx929_supp.pdf [file gkx929_supp.pdf]

## Supplementary Data

**Table S1. Bacterial strains and plasmids used in this study.**

| Strains               | Genotype/Phenotype                                                                                                      | Source     |
|-----------------------|-------------------------------------------------------------------------------------------------------------------------|------------|
| <i>E. coli</i>        | BW25141/pkD4 amp <sup>R</sup> kan <sup>R</sup>                                                                          | (1)        |
| <i>E. coli</i>        | BL21 (DE3) pLysE/hfq:: <i>aph</i> + pCSB12 ( <i>csrA</i> cloned into the <i>NdeI</i> and <i>BamHI</i> sites of pET21a+) | This study |
| <i>S. Typhimurium</i> | SL1344                                                                                                                  | (2)        |
| <i>S. Typhimurium</i> | SL1344 $\Delta$ <i>acrB</i>                                                                                             | (3)        |
| <i>S. Typhimurium</i> | SL1344 <i>acrA</i> :: <i>aph</i>                                                                                        | (3)        |
| <i>S. Typhimurium</i> | SL1344 <i>ramA</i> :: <i>aph</i>                                                                                        | This study |
| <i>S. Typhimurium</i> | SL1344(pACYC- <i>ramA</i> ::3xFLAG:: <i>aph</i> )                                                                       | (4)        |
| <i>S. Typhimurium</i> | SL1344 <i>csrA</i> :: <i>aph</i> + (pACYC- <i>ramA</i> ::3xFLAG:: <i>aph</i> )                                          | This study |
| <i>S. Typhimurium</i> | SL1344 pKD46 amp <sup>R</sup>                                                                                           | (5)        |
| <i>S. Typhimurium</i> | ATCC 14028S                                                                                                             | (6)        |
| <i>S. Typhimurium</i> | SL1344 <i>ramR</i> :: <i>aph</i>                                                                                        | (7)        |
| <i>S. Typhimurium</i> | SL1344 pMW82 <i>pramA</i>                                                                                               | (8)        |
| <i>S. Typhimurium</i> | SL1344 pMW82 <i>pacrAB</i>                                                                                              | This study |
| <i>S. Typhimurium</i> | SL1344 <i>csrA</i> :: <i>aph</i> (Kan <sup>R</sup> )                                                                    | This study |
| <i>S. Typhimurium</i> | 14028S <i>csrA</i> :: <i>aph</i> (Kan <sup>R</sup> )                                                                    | This study |
| <i>S. Typhimurium</i> | SL1344 <i>csrA</i> :: <i>aph</i> + pMW82- <i>pacrAB</i>                                                                 | This study |
| <i>S. Typhimurium</i> | SL1344 <i>csrA</i> :: <i>aph</i> + pMW82- <i>pramA</i>                                                                  | This study |
| <i>S. Typhimurium</i> | SL1344 <i>csrA</i> :: <i>aph</i> + pWSK30 <i>csrA</i>                                                                   | This study |
| <i>S. Typhimurium</i> | SL1344 pMW82- <i>pacrAB</i> (CsrA BS-SDM)                                                                               | This study |
| <i>S. Typhimurium</i> | Ciprofloxacin selected MDR mutant                                                                                       | (5)        |
| <i>S. Typhimurium</i> | Ciprofloxacin selected MDR mutant/ <i>csrA</i> :: <i>aph</i>                                                            | This study |
| <i>S. Typhimurium</i> | $\Delta$ <i>ramR</i> / <i>csrA</i> :: <i>aph</i> (Kan <sup>R</sup> )                                                    | This study |
| <i>S. Typhimurium</i> | pAcrA-TF-WT                                                                                                             | This study |
| <i>S. Typhimurium</i> | pAcrA-TF-SDM                                                                                                            | This study |
| <b>Plasmids</b>       |                                                                                                                         |            |

|                                                     |                                                                                                                                                                                        |                  |
|-----------------------------------------------------|----------------------------------------------------------------------------------------------------------------------------------------------------------------------------------------|------------------|
| pMW82                                               | Promoter trap vector containing a promoterless <i>gfp</i> gene                                                                                                                         | (9)              |
| pMW82- <i>pramA</i>                                 | DNA fragment carrying the <i>ramA</i> promoter region, flanked by <i>BamHI</i> and <i>XbaI</i> restriction sites cloned into pMW82                                                     | (8)              |
| pMW82- <i>pacrAB</i>                                | DNA fragment carrying the <i>acrAB</i> promoter region, flanked by <i>BamHI</i> and <i>XbaI</i> restriction sites cloned into pMW82                                                    | This study       |
| pMW82- <i>pacrAB</i><br>(CsrA BS-SDM)               | DNA fragment carrying the <i>acrAB</i> promoter region with mutated CsrA binding sites, flanked by <i>BamHI</i> and <i>XbaI</i> restriction sites cloned into pMW82                    | This study       |
| pMW82- <i>pacrAB</i><br>(RNase E- DEL)              | DNA fragment carrying the <i>acrAB</i> promoter region with putative RNase E cleavage site region deleted, flanked by <i>BamHI</i> and <i>XbaI</i> restriction sites cloned into pMW82 | This study       |
| pWSK30                                              | Multi-purpose low-copy-number vector                                                                                                                                                   | (10)             |
| pWSK30 <i>csrA</i>                                  | <i>csrA</i> gene flanked by <i>BamHI</i> and <i>HindIII</i> restriction sites cloned into pWSK30                                                                                       | This study       |
| pACYC-<br><i>ramA::3xFLAG::aph</i>                  | DNA fragment carrying the <i>ramA::3XFLAG::aph</i> flanked by <i>HindIII</i> and <i>NruI</i> restriction sites cloned into the multicopy plasmid pACYC                                 | (4)              |
| pCR <sup>®</sup> II-TOPO <sup>®</sup>               | Cloning vector with LacZ reporter, T7 and SP6 promoter sites, amp & kan resistance                                                                                                     | Thermo<br>Fisher |
| pCR <sup>®</sup> II- <i>pramA</i>                   | DNA fragment carrying the <i>ramA</i> promoter region cloned into pCR <sup>®</sup> II-TOPO <sup>®</sup>                                                                                | This study       |
| pCR <sup>®</sup> II- <i>pacrAB</i>                  | DNA fragment carrying the <i>acrAB</i> promoter region cloned into pCR <sup>®</sup> II-TOPO <sup>®</sup>                                                                               | This study       |
| pCR <sup>®</sup> II- <i>phfq</i>                    | DNA fragment carrying the <i>hfq</i> promoter region cloned into pCR <sup>®</sup> II-TOPO <sup>®</sup>                                                                                 | This study       |
| pCR <sup>®</sup> II- <i>pacrAB</i><br>(CsrA BS-SDM) | DNA fragment carrying the <i>acrAB</i> promoter region with mutated CsrA binding sites cloned into pCR <sup>®</sup> II-TOPO <sup>®</sup>                                               | This study       |

|                                   |                                                                                                                                                                                                             |            |
|-----------------------------------|-------------------------------------------------------------------------------------------------------------------------------------------------------------------------------------------------------------|------------|
| pAcrA-TF-WT                       | DNA fragment carrying the WT <i>acrAB</i> promoter region plus the <i>acrA</i> CDS minus stop codon flanked by <i>BamHI</i> and <i>KpnI</i> restriction sites cloned into pDOC-G                            | This study |
| pAcrA-TF-SDM                      | DNA fragment carrying the <i>acrAB</i> promoter region with nucleotide substitutions plus the <i>acrA</i> CDS minus stop codon flanked by <i>BamHI</i> and <i>KpnI</i> restriction sites cloned into pDOC-G | This study |
| pT7- <i>acrA</i> -GFP             | DNA fragment carrying the <i>acrA</i> -GFP translational fusion with wildtype leader sequence cloned into the pET-20b(+) vector (Novagen)                                                                   | This study |
| pT7- <i>acrA</i> -GFP Mut CsrA BS | DNA fragment carrying the <i>acrA</i> -GFP translational fusion with mutated CsrA binding sites in the leader sequence cloned into the pET-20b(+) vector (Novagen)                                          | This study |

---

**Table S2.****Phenotype of *Salmonella Typhimurium csrA::aph* and MDR mutants**

| Strain                                           | Antimicrobial susceptibilities |     |     |     |      | Growth in LB and MOPs minimal medium |                 | Biofilm formation |
|--------------------------------------------------|--------------------------------|-----|-----|-----|------|--------------------------------------|-----------------|-------------------|
|                                                  | MIC (mg/L)                     |     |     |     |      | Generation time (mins)               |                 | OD (600nm)        |
|                                                  | CIP                            | NAL | CHL | TET | EtBr | LB                                   | MOPs            |                   |
| SL1344                                           | 0.015                          | 4   | 2   | 1   | 2048 | 47.5 +/- 5.4                         | 100.2 +/- 8.9   | 0.29 +/- 0.06     |
| SL1344 <i>csrA::aph</i>                          | 0.015                          | 4   | 2   | 1   | 2048 | 182.5 +/- 12.5*                      | 374.3 +/- 16.2* | 0.05 +/- 0.02*    |
| SL1344 <i>csrA::aph</i> (pWSK30 <i>csrA</i> )    | 0.015                          | 4   | 2   | 1   | 2048 | 49.3 +/- 6.2                         | 105.4 +/- 6.7   | 0.31 +/- 0.04     |
| SL1344 <i>ramR::aph</i>                          | 0.06                           | 16  | 16  | 8   | 2048 | ND                                   | ND              | ND                |
| SL1344 $\Delta$ <i>ramR/csrA::aph</i>            | 0.03                           | 8   | 8   | 4   | 256  | ND                                   | ND              | ND                |
| SL1344 CIP selected MDR mutant                   | 0.12                           | 32  | 16  | 8   | 2048 | ND                                   | ND              | ND                |
| SL1344 CIP selected MDR mutant/ <i>csrA::aph</i> | 0.03                           | 8   | 4   | 2   | 512  | ND                                   | ND              | ND                |

CIP, ciprofloxacin; NAL, nalidixic acid; CHL, chloramphenicol; TET, tetracycline; EtBr, ethidium bromide; LB, Luria-Bertani broth; MOPs, MOPs minimal medium. ND, not done. \* $P < 0.05$  by Student's t-test.

**Table S3. Analysis of the second elution fraction analysed by Fourier transform ion cyclotron resonance (FT-ICR) mass spectrometry.**

| Accession  | Description                                                                                                    | Score | Coverage | # Proteins | # Unique Peptides | # Peptides | # PSMs | # AAs | MW [kDa] | calc. pI |
|------------|----------------------------------------------------------------------------------------------------------------|-------|----------|------------|-------------------|------------|--------|-------|----------|----------|
| A7ZQC4     | Carbon storage regulator OS=Escherichia coli O139:H28 (strain E24377A / ETEC) GN=csrA PE=3 SV=1 - [CSRA_ECO24] | 25.83 | 63.93    | 5          | 2                 | 5          | 7      | 61    | 6.9      | 8.62     |
| A0A080J9U6 | Carbon storage regulator OS=Escherichia coli 2-460-02_S1_C2 GN=AB34_3203 PE=4 SV=1 - [A0A080J9U6_ECOLX]        | 14.93 | 67.35    | 4          | 1                 | 4          | 5      | 49    | 5.5      | 7.25     |
| A0A086VAZ1 | Molybdopterin synthase small subunit OS=Escherichia coli GN=moaD PE=4 SV=1 - [A0A086VAZ1_ECOLX]                | 9.48  | 29.17    | 38         | 1                 | 1          | 2      | 72    | 7.7      | 4.42     |
| D7XFN1     | Murein-lipoprotein (Fragment) OS=Escherichia coli MS 198-1 GN=lpp PE=4 SV=1 - [D7XFN1_ECOLX]                   | 5.87  | 35.62    | 16         | 2                 | 2          | 2      | 73    | 7.7      | 6.60     |
| E9YIC2     | Entericidin EcnA/B family protein OS=Escherichia coli TA007 GN=ERHG_03462 PE=4 SV=1 - [E9YIC2_ECOLX]           | 3.90  | 40.43    | 6          | 1                 | 1          | 1      | 47    | 4.7      | 8.21     |
| P49064     | Serum albumin OS=Felis catus GN=ALB PE=1 SV=1 - [ALBU_FELCA]                                                   | 2.50  | 2.47     | 1          | 1                 | 1          | 1      | 608   | 68.6     | 5.66     |
| K3GH09     | Phage portal family protein (Fragment) OS=Escherichia coli 5412 GN=EC5412_1619 PE=4 SV=1 - [K3GH09_ECOLX]      | 0.00  | 6.59     | 1          | 1                 | 1          | 1      | 91    | 10.2     | 6.51     |
| T8NXA3     | Inner membrane protein ytfF OS=Escherichia coli UMEA 3097-1 GN=G907_04361 PE=4 SV=1 - [T8NXA3_ECOLX]           | 0.00  | 13.19    | 142        | 1                 | 1          | 3      | 235   | 26.1     | 9.07     |

**Figure S1**

Expression of GFP from pMW82*pramA* from eight random transposon mutants, chosen from the four FACS gated populations (P4, P5, P6 and P7).

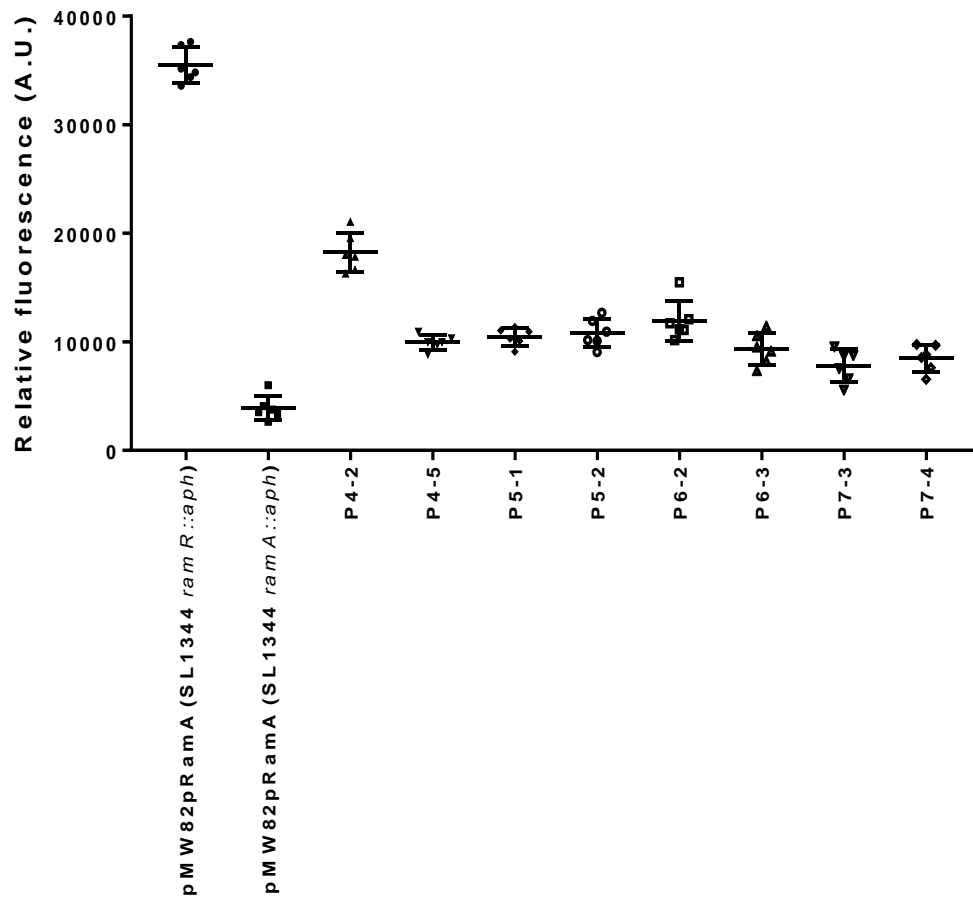

**Figure S2** Infection assays with SL1344 and SL1344 *csrA::aph* mutant in INT-407 human embryonic intestine cells. Association and invasion of the SL1344 *csrA::aph* mutant into INT-407 cells was compared to that of the parental wild-type strain, SL1344.

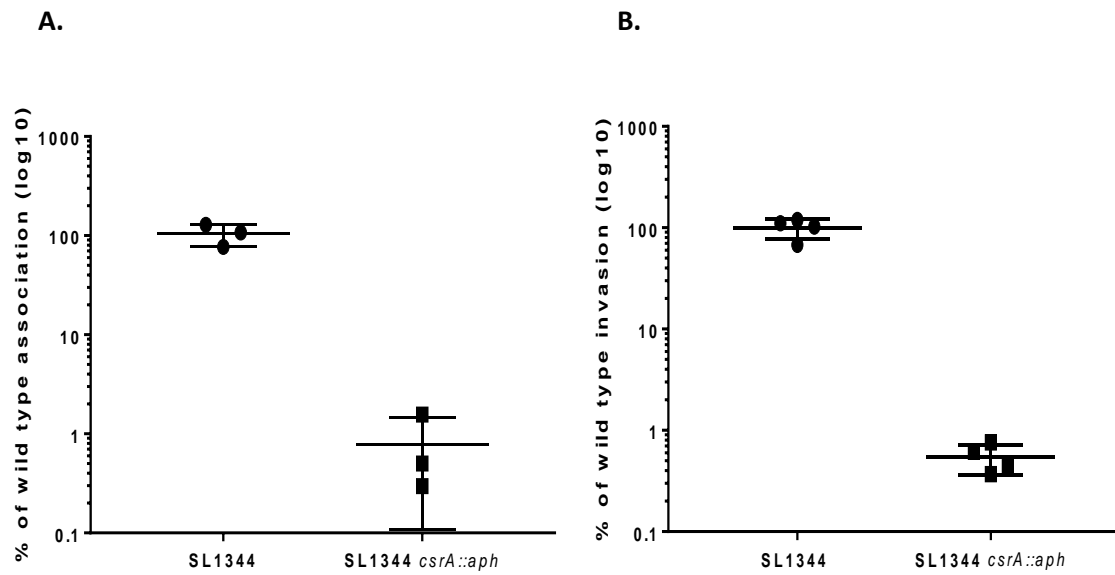

**Figure S3.**

Rate of efflux of ethidium bromide. **A.** (—), SL1344; (—), SL1344 *csrA::aph*. **B.** (—), SL1344  $\Delta ramR$ ; (—), SL1344  $\Delta ramR/csrA::aph$ . **C.** (—), SL1344 MDR mutant; (—), SL1344 MDR/*csrA::aph*.

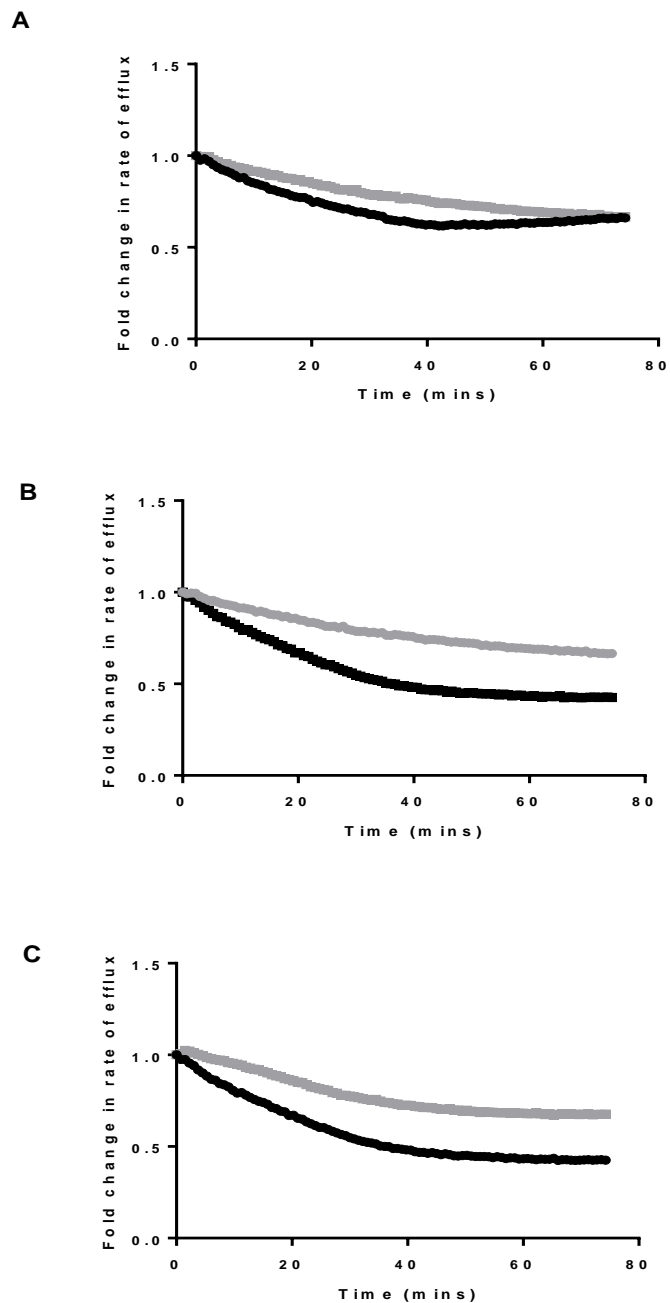



**Figure S4: Uncropped gel images.** The images correspond to EMSA gels presented in Figures 4 A-D.

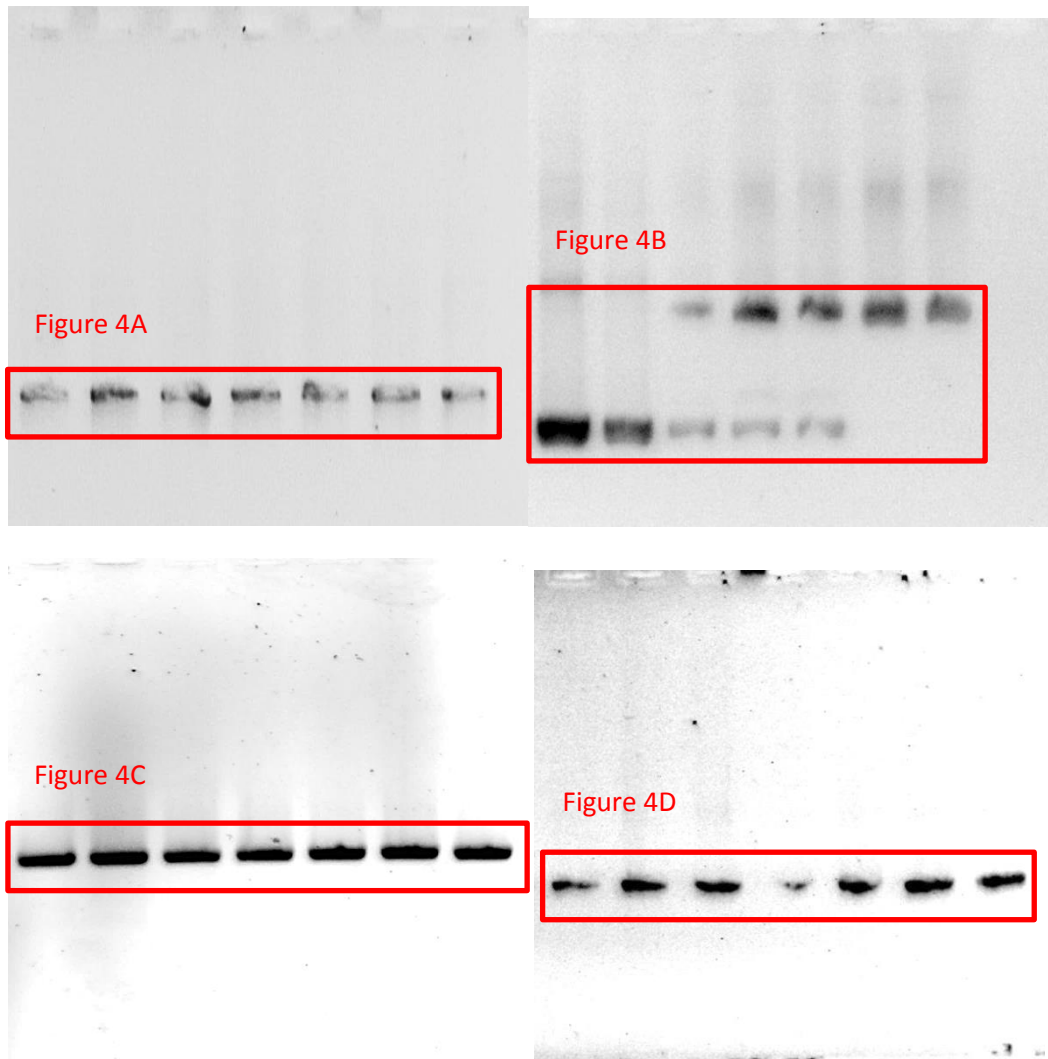

**Figure S5.** Coomassie blue stained SDS-PAGE gel (A) and anti-His tag Western blot (B) of fractions derived from purification of CsrA-His protein. M = Protein ladder, 1 = Flow through, 2 = Wash 1, 3 = Wash 2, 4 = Elute 1, 5 = Elute 2.

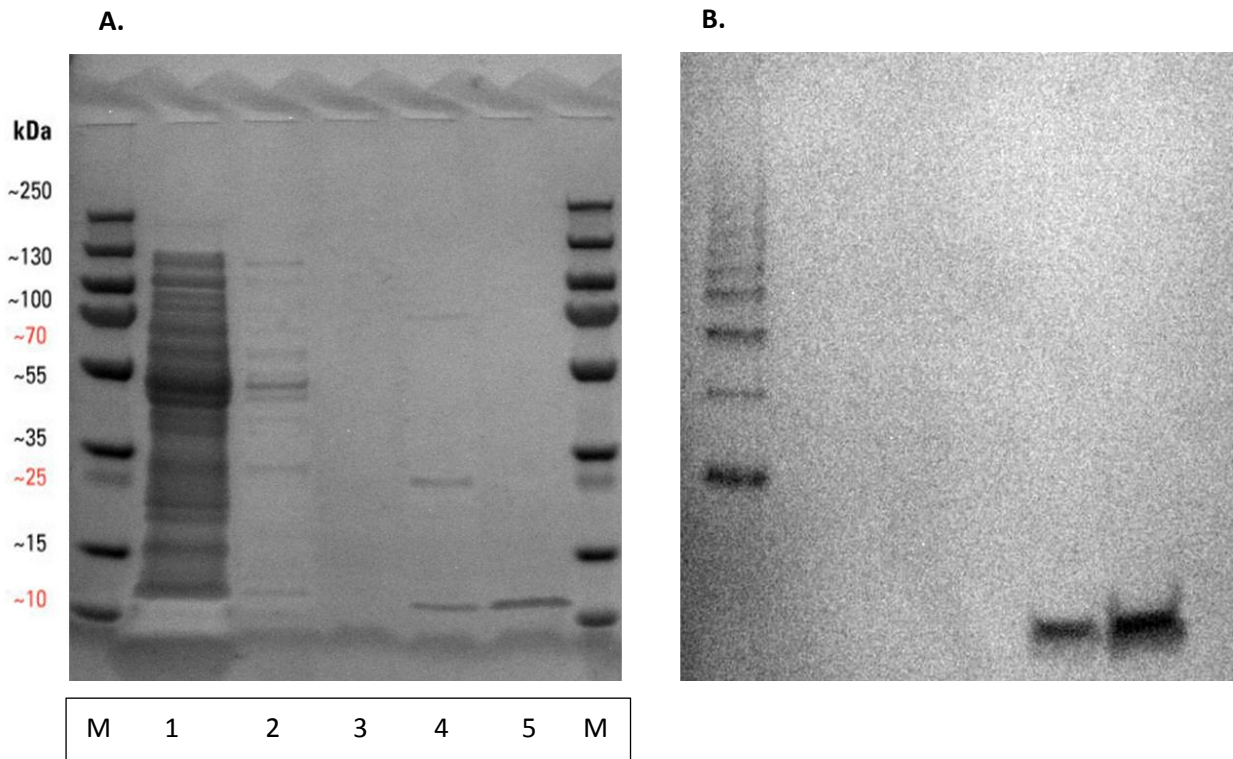

**Figure S6.** Coomassie blue stained protein gels corresponding to the Western blots described in Figures 3 and 11.

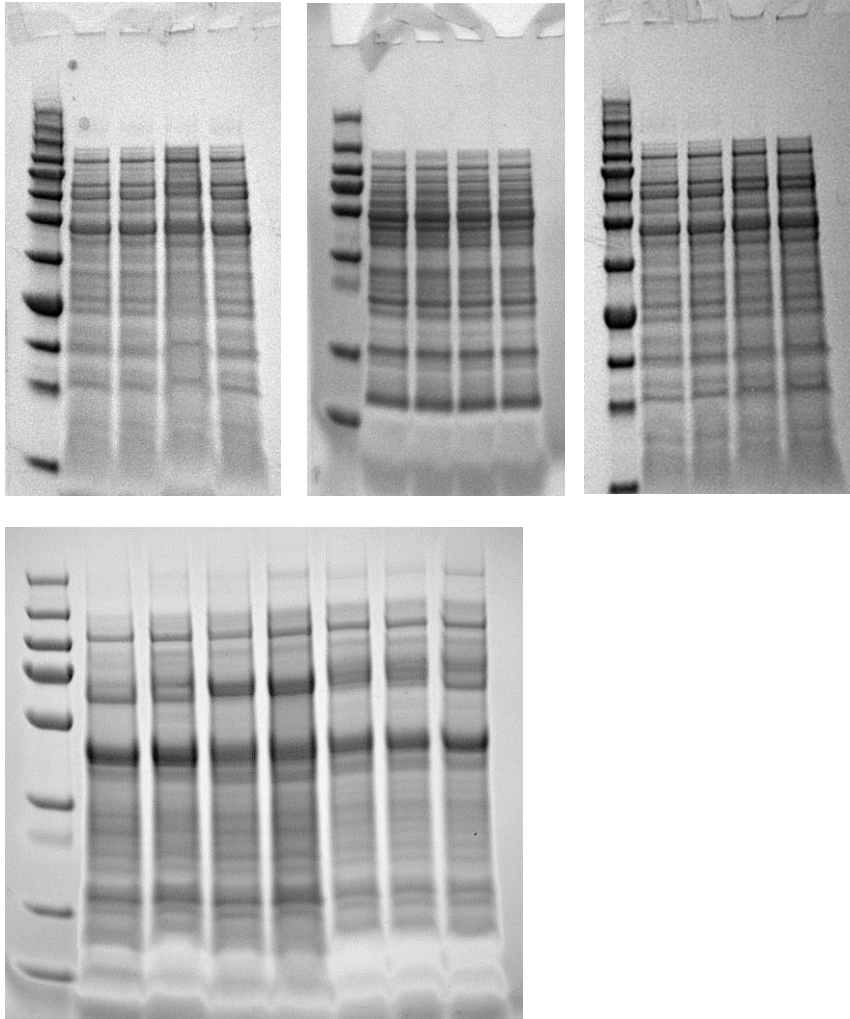

## Supplementary References

1. Datsenko, K.A. and Wanner, B.L. (2000) One-step inactivation of chromosomal genes in *Escherichia coli* K-12 using PCR products. *Proc Natl Acad Sci U S A*, **97**, 6640-6645.
2. Wray, C. and Sojka, W.J. (1978) Experimental *Salmonella typhimurium* infection in calves. *Res Vet Sci*, **25**, 139-143.
3. Buckley, A.M., Webber, M.A., Cooles, S., Randall, L.P., La Ragione, R.M., Woodward, M.J. and Piddock, L.J. (2006) The AcrAB-TolC efflux system of *Salmonella enterica* serovar Typhimurium plays a role in pathogenesis. *Cell Microbiol*, **8**, 847-856.
4. Ricci, V., Blair, J.M. and Piddock, L.J. (2014) RamA, which controls expression of the MDR efflux pump AcrAB-TolC, is regulated by the Lon protease. *J Antimicrob Chemother*, **69**, 643-650.
5. Ricci, V., Tzakas, P., Buckley, A. and Piddock, L.J. (2006) Ciprofloxacin-resistant *Salmonella enterica* serovar Typhimurium strains are difficult to select in the absence of AcrB and TolC. *Antimicrob Agents Chemother*, **50**, 38-42.
6. Fields, P.I., Swanson, R.V., Haidaris, C.G. and Heffron, F. (1986) Mutants of *Salmonella typhimurium* that cannot survive within the macrophage are avirulent. *Proc Natl Acad Sci U S A*, **83**, 5189-5193.
7. Ricci, V., Busby, S.J. and Piddock, L.J. (2012) Regulation of RamA by RamR in *Salmonella enterica* serovar Typhimurium: isolation of a RamR superrepressor. *Antimicrob Agents Chemother*, **56**, 6037-6040.
8. Lawler, A.J., Ricci, V., Busby, S.J. and Piddock, L.J. (2013) Genetic inactivation of *acrAB* or inhibition of efflux induces expression of *ramA*. *J Antimicrob Chemother*, **68**, 1551-1557.
9. Bumann, D. and Valdivia, R.H. (2007) Identification of host-induced pathogen genes by differential fluorescence induction reporter systems. *Nat Protoc*, **2**, 770-777.
10. Wang, R.F. and Kushner, S.R. (1991) Construction of versatile low-copy-number vectors for cloning, sequencing and gene expression in *Escherichia coli*. *Gene*, **100**, 195-199.
